# Supplementary material for: GOBLIN: A land-balance model to identify national agriculture and land use pathways to climate neutrality via backcasting
Source: Copernicus journal article supplement (doi:10.5194/gmd-2021-228), 2021-08-17
Supplement: Supplementary file [file gmd-2021-228-AC1-supplement.pdf]

# Expanded Boundary LCA

## National Inventory Boundary

### AFOLU boundary

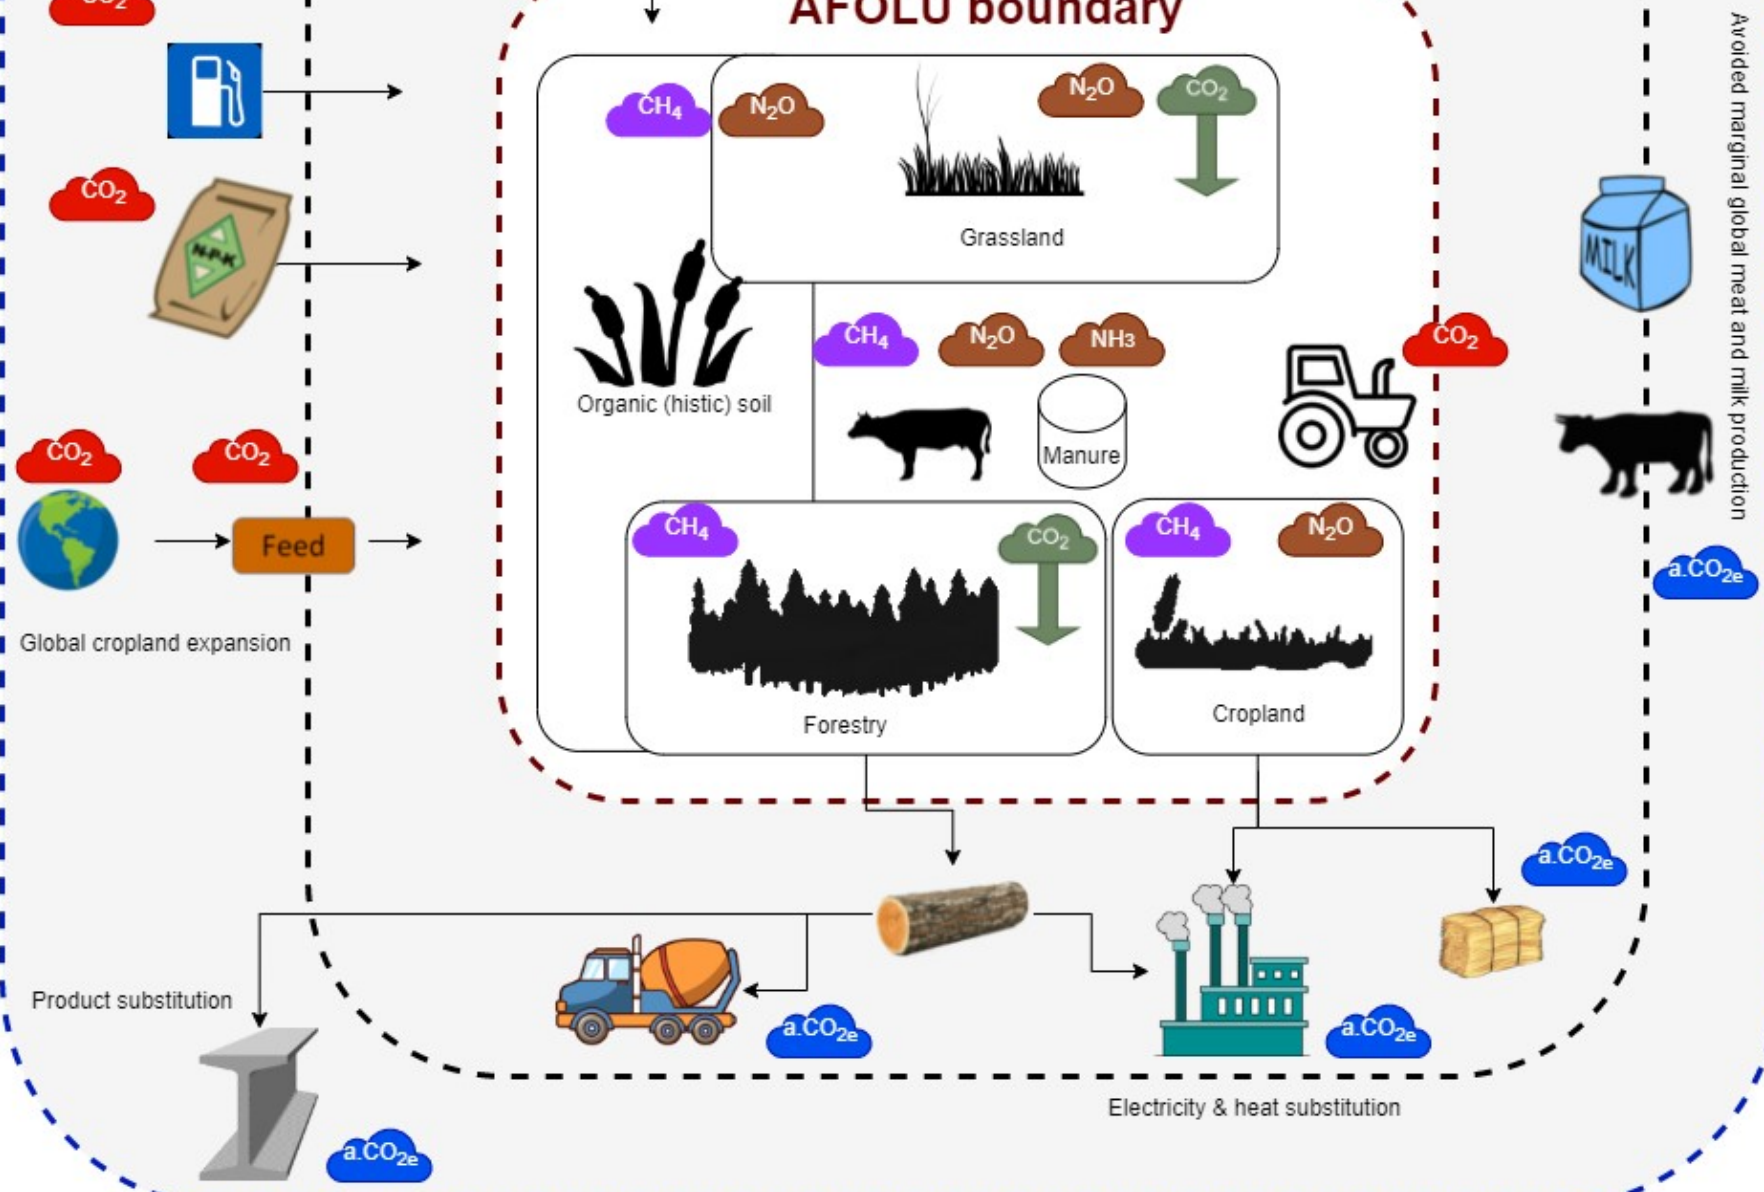

### Legend

- CH<sub>4</sub> Emission
- CO<sub>2</sub> Emission
- N Emission
- Sequestration
- a.CO<sub>2</sub>e CO<sub>2</sub> e avoided
